# Supplementary material for: Molecular Evolutionary Pathways toward Two Successful Community-Associated but Multidrug-Resistant ST59 Methicillin-Resistant Staphylococcus aureus Lineages in Taiwan: Dynamic Modes of Mobile Genetic Element Salvages
Source: PubMed Central journal article supplement (PMC5015870; doi:10.1371/journal.pone.0162526), 2016-09-08
Supplement: pone.0162526.s001.pdf [file pone.0162526.s001.pdf]

A

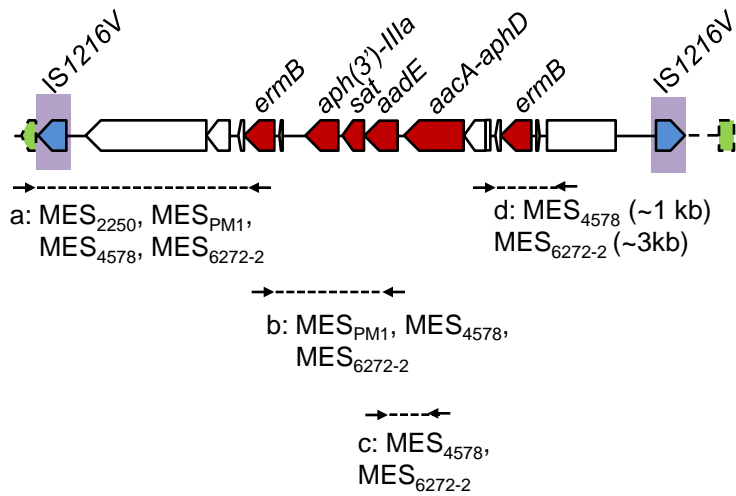

B

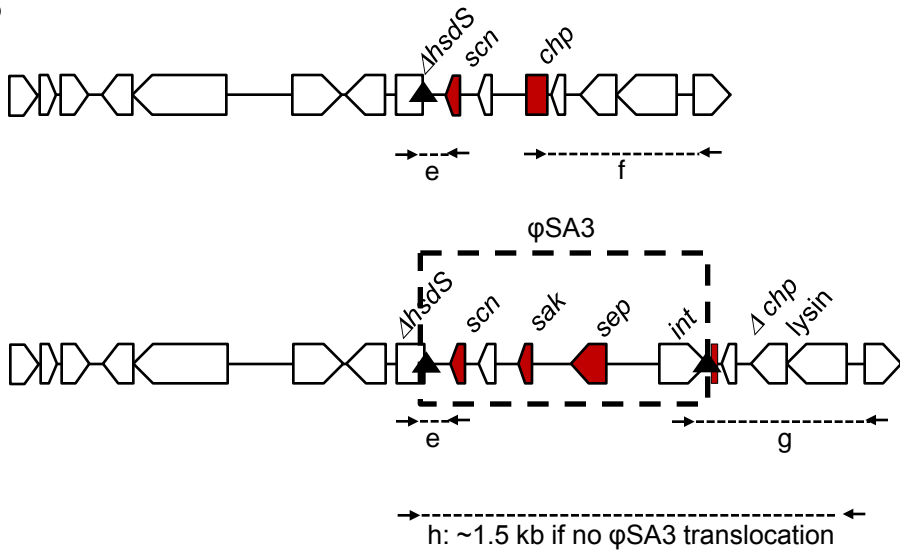

C

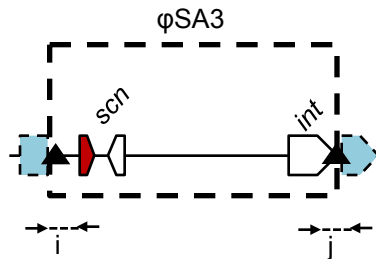

**S1 Fig. Cartoon representation of PCR mapping.**

Schematic maps of (A) MES, (B) vSaβ and (C) φSA3 integrated within *hlyB* are shown. The arrows below the structures indicate PCR primers, which are listed in S2 Table.
