# Supplementary material for: Molecular Evolutionary Pathways toward Two Successful Community-Associated but Multidrug-Resistant ST59 Methicillin-Resistant Staphylococcus aureus Lineages in Taiwan: Dynamic Modes of Mobile Genetic Element Salvages
Source: PubMed Central journal article supplement (PMC5015870; doi:10.1371/journal.pone.0162526), 2016-09-08
Supplement: pone.0162526.s002.pdf [file pone.0162526.s002.pdf]

**S1 Table. Information of bacterial isolates.**

| Strain No. | Isolate date | ST type | <i>spa</i> type | SCC <i>mec</i>  | Specimen | CA-MRSA <sup>a</sup> |
|------------|--------------|---------|-----------------|-----------------|----------|----------------------|
| 1915       | 2000/01/19   |         | t437            | -               | Blood    | ND                   |
| 4507       | 2000/02/12   | 59      | t437            | -               | Blood    | ND                   |
| 135        | 2000/04/06   |         | t7496           | -               | Blood    | ND                   |
| 2850       | 2000/04/29   |         | t437            | -               | Blood    | ND                   |
| 3959       | 2000/05/08   |         | t441            | -               | Blood    | ND                   |
| 6771       | 2000/08/24   |         | t437            | -               | Blood    | ND                   |
| 248        | 2000/09/22   |         | t437            | -               | Blood    | ND                   |
| 2575       | 2000/10/12   |         | t437            | -               | Blood    | ND                   |
| 3809       | 2000/10/21   |         | t441            | -               | Blood    | ND                   |
| 7259       | 2000/11/21   |         | t437            | -               | Blood    | ND                   |
| 609        | 2005/1/2     |         | t437            | -               | Blood    | ND                   |
| 3636       | 2005/5/16    |         | t437            | -               | Blood    | ND                   |
| 7135       | 2005/7/28    |         | t437            | -               | Blood    | ND                   |
| 3883       | 2005/9/9     |         | t8886           | -               | Blood    | ND                   |
| 6414-1     | 2005/9/20    |         | t437            | -               | Blood    | ND                   |
| 740        | 2005/10/16   |         | t437            | -               | Blood    | ND                   |
| 6280       | 2005/11/20   | 59      | t437            | -               | Blood    | ND                   |
| 8749       | 2005/12/6    |         | t437            | -               | Blood    | ND                   |
| 288        | 2010/01/12   |         | t437            | -               | Blood    | ND                   |
| 1642       | 2010/01/19   | 59      | t437            | -               | Blood    | ND                   |
| 9930       | 2010/06/13   |         | t437            | -               | Blood    | ND                   |
| 9145       | 2010/07/24   |         | t3385           | -               | Blood    | ND                   |
| 413        | 2010/07/30   |         | t437            | -               | Blood    | ND                   |
| 4235       | 2010/11/18   |         | t437            | -               | Blood    | ND                   |
| 345        | 2010/12/17   |         | t437            | -               | Blood    | ND                   |
| 7601       | 2011/3/7     |         | t437            | -               | Blood    | ND                   |
| 2-1850     | 2011/4/24    |         | t437            | -               | Blood    | ND                   |
| 5656       | 2011/10/11   |         | t437            | -               | Blood    | ND                   |
| 8780       | 2011/12/13   | 59      | t437            | -               | Blood    | ND                   |
| 1507       | 2011/12/26   |         | t437            | -               | Blood    | ND                   |
| 1742       | 2000/1/17    |         | t437            | IV <sub>g</sub> | Blood    | ND                   |
| 3507       | 2000/2/2     |         | t437            | IV <sub>g</sub> | Blood    | ND                   |
| 6915       | 2000/3/6     |         | t437            | IV <sub>g</sub> | Blood    | ND                   |
| 8007       | 2000/3/16    |         | t437            | IV <sub>g</sub> | Blood    | ND                   |
| 8784       | 2000/3/23    |         | t437            | IV <sub>g</sub> | Blood    | ND                   |
| 396        | 2000/4/7     |         | t437            | IV <sub>a</sub> | Blood    | ND                   |
| 1929       | 2000/4/20    |         | t437            | IV <sub>g</sub> | Blood    | ND                   |
| 2351       | 2000/4/24    | 59      | t437            | IV <sub>a</sub> | Blood    | ND                   |
| 4287       | 2000/5/11    | 59      | t3513           | IV <sub>g</sub> | Blood    | ND                   |
| 4369       | 2000/5/12    |         | t437            | IV <sub>g</sub> | Blood    | ND                   |
| 6105       | 2000/5/26    |         | t437            | IV <sub>g</sub> | Blood    | ND                   |
| 7921       | 2000/6/12    |         | t437            | IV <sub>g</sub> | Blood    | ND                   |
| 9330       | 2000/6/22    |         | t3485           | IV <sub>g</sub> | Blood    | ND                   |
| 2697       | 2000/7/21    |         | New type        | IV <sub>g</sub> | Blood    | ND                   |
| 3706       | 2000/7/29    |         | t437            | IV <sub>g</sub> | Blood    | ND                   |
| 8526       | 2000/9/7     |         | t437            | IV <sub>g</sub> | Blood    | ND                   |
| 4456       | 2000/10/27   |         | t437            | IV <sub>g</sub> | Blood    | ND                   |
| 4572       | 2000/10/28   |         | t437            | IV <sub>g</sub> | Blood    | ND                   |
| 4773       | 2000/10/30   |         | t437            | IV <sub>g</sub> | Blood    | ND                   |
| 5324       | 2000/11/4    |         | t437            | IV <sub>g</sub> | Blood    | ND                   |

|        |            |    |          |                                  |                     |     |
|--------|------------|----|----------|----------------------------------|---------------------|-----|
| 6940   | 2000/11/17 |    | t437     | IV <sub>g</sub>                  | Blood               | ND  |
| 7061   | 2000/11/20 |    | t437     | IV <sub>g</sub>                  | Blood               | ND  |
| 7169   | 2000/11/20 |    | t437     | IV <sub>g</sub>                  | Blood               | ND  |
| 586    | 2005/1/2   |    | t437     | IV <sub>g</sub>                  | Blood               | ND  |
| 7078   | 2005/2/11  |    | t437     | IV <sub>g</sub>                  | Blood               | ND  |
| 244    | 2005/3/3   |    | t437     | IV <sub>g</sub>                  | Blood               | ND  |
| 312    | 2005/3/3   |    | t1751    | IV <sub>g</sub>                  | Blood               | ND  |
| 3850   | 2005/3/23  |    | t441     | IV <sub>g</sub>                  | Blood               | ND  |
| 6578   | 2005/4/7   |    | New type | IV <sub>g</sub>                  | Blood               | ND  |
| 7666-1 | 2005/4/13  |    | t437     | IV <sub>g</sub>                  | Blood               | ND  |
| 8196-1 | 2005/4/16  |    | t437     | IV <sub>g</sub>                  | Blood               | ND  |
| 8844   | 2005/4/19  |    | t437     | IV <sub>g</sub>                  | Blood               | ND  |
| 8993   | 2005/4/20  |    | t437     | IV <sub>g</sub>                  | Blood               | ND  |
| 2994   | 2005/5/12  |    | t437     | IV <sub>g</sub>                  | Blood               | ND  |
| 3943   | 2005/5/17  | 59 | t437     | IV <sub>g</sub>                  | Blood               | ND  |
| 5594   | 2005/5/26  |    | t441     | IV <sub>g</sub>                  | Blood               | ND  |
| 8401   | 2005/6/10  |    | t437     | IV <sub>g</sub>                  | Blood               | ND  |
| 3401   | 2005/7/7   |    | t437     | IV <sub>g</sub>                  | Blood               | ND  |
| 4533   | 2005/7/13  |    | t437     | IV <sub>g</sub>                  | Blood               | ND  |
| 6083-2 | 2005/7/22  |    | t437     | IV <sub>g</sub>                  | Blood               | ND  |
| 6385   | 2005/7/24  |    | t437     | IV <sub>g</sub>                  | Blood               | ND  |
| 8061   | 2005/8/3   |    | t437     | IV <sub>g</sub>                  | Blood               | ND  |
| 770    | 2005/8/19  |    | t437     | IV <sub>g</sub>                  | Blood               | ND  |
| 807    | 2005/8/19  |    | t437     | IV <sub>g</sub>                  | Blood               | ND  |
| 5514   | 2005/9/15  |    | t441     | IV <sub>g</sub>                  | Blood               | ND  |
| 8483   | 2005/10/3  | 59 | t437     | SCC <sub>mec</sub> IV nontypable | Blood               | ND  |
| 9772-1 | 2005/10/11 |    | t437     | IV <sub>g</sub>                  | Blood               | ND  |
| 74     | 2005/10/12 |    | t437     | IV <sub>g</sub>                  | Blood               | ND  |
| 929    | 2005/10/18 |    | t437     | SCC <sub>mec</sub> IV nontypable | Blood               | ND  |
| 2370   | 2005/10/27 |    | t437     | IV <sub>g</sub>                  | Blood               | ND  |
| c8032  | 2005/11/4  |    | t441     | IV <sub>g</sub>                  | Blood               | ND  |
| 4265   | 2005/11/9  |    | t437     | IV <sub>g</sub>                  | Blood               | ND  |
| 4703   | 2005/11/10 |    | t437     | IV <sub>g</sub>                  | Blood               | ND  |
| 5439   | 2005/11/14 |    | t437     | IV <sub>g</sub>                  | Blood               | ND  |
| 5547   | 2005/11/15 |    | t437     | IV <sub>a</sub>                  | Blood               | ND  |
| 1436   | 2005/12/24 |    | t3513    | IV <sub>g</sub>                  | Blood               | ND  |
| 1476   | 2005/12/25 |    | t437     | IV <sub>g</sub>                  | Blood               | ND  |
| 4136   | 2005/2/26  | 59 | t437     | IV <sub>g</sub>                  | sputum              | Yes |
| 4939   | 2005/3/2   |    | t3485    | IV <sub>g</sub>                  | surgical wound      | Yes |
| 6615   | 2005/3/9   |    | t1751    | IV <sub>g</sub>                  | pus                 | Yes |
| 4516   | 2005/5/15  | 59 | t437     | IV <sub>g</sub>                  | sputum              | Yes |
| 5005   | 2005/5/17  | 59 | t1751    | IV <sub>g</sub>                  | umbilical discharge | Yes |
| 5704   | 2005/5/19  |    | t3424    | IV <sub>g</sub>                  | pus                 | Yes |
| 748    | 2005/6/7   |    | t437     | IV <sub>c</sub>                  | sputum              | Yes |
| 1576   | 2005/6/10  |    | t437     | IV <sub>g</sub>                  | eye                 | Yes |
| 187-4  | 2010/01/11 |    | t437     | IV <sub>g</sub>                  | Blood               | ND  |
| 1070   | 2010/01/16 |    | t1751    | IV <sub>g</sub>                  | Blood               | ND  |
| 1265   | 2010/01/17 |    | t437     | IV <sub>g</sub>                  | Blood               | ND  |
| 7576   | 2010/02/21 |    | t437     | IV <sub>a</sub>                  | Blood               | ND  |
| 9852   | 2010/03/05 |    | t437     | IV <sub>g</sub>                  | Blood               | ND  |
| 2413   | 2010/03/08 |    | t437     | IV <sub>g</sub>                  | Blood               | ND  |
| 2250   | 2010/03/18 |    | t437     | IV <sub>g</sub>                  | Blood               | ND  |
| 2738   | 2010/03/20 |    | t437     | IV <sub>g</sub>                  | Blood               | ND  |

|        |            |    |          |                  |       |    |
|--------|------------|----|----------|------------------|-------|----|
| 6272-2 | 2010/04/07 | 59 | t437     | IVg              | Blood | ND |
| 4578   | 2010/05/18 | 59 | t437     | IVg              | Blood | ND |
| 4830   | 2010/05/19 |    | t4134    | IVg              | Blood | ND |
| 8220   | 2010/06/04 |    | t437     | IVg              | Blood | ND |
| 8256   | 2010/06/04 |    | t437     | IVg              | Blood | ND |
| 6591   | 2010/07/12 |    | t437     | IVg              | Blood | ND |
| 8283   | 2010/07/20 |    | t437     | IVg              | Blood | ND |
| 6306   | 2010/10/12 |    | t437     | IVa              | Blood | ND |
| 6859   | 2010/10/14 |    | t441     | IVg              | Blood | ND |
| 2362   | 2010/10/31 |    | t437     | IVa              | Blood | ND |
| 2522   | 2010/11/10 |    | t1950    | IVg              | Blood | ND |
| 9391   | 2010/12/13 |    | t437     | IVg              | Blood | ND |
| 1161   | 2011/04/14 |    | t437     | IVg              | Blood | ND |
| 7649   | 2011/04/22 |    | t437     | IVg              | Blood | ND |
| 6077   | 2011/07/15 |    | t437     | IVa              | Blood | ND |
| 3768   | 2011/10/01 | 59 | t437     | IVg              | Blood | ND |
| 3858   | 2011/10/02 | 59 | t437     | IVg              | Blood | ND |
| 7261   | 2011/12/06 |    | t437     | IVg              | Blood | ND |
| 5401   | 2000/2/21  |    | t437     | SCCmec V (5C2&5) | Blood | ND |
| 5819   | 2000/2/24  |    | t437     | SCCmec V (5C2&5) | Blood | ND |
| 5923   | 2000/2/25  |    | t437     | SCCmec V (5C2&5) | Blood | ND |
| 8005   | 2000/3/16  |    | t437     | SCCmec V (5C2&5) | Blood | ND |
| 1136   | 2000/4/13  | 59 | t437     | SCCmec V (5C2&5) | Blood | ND |
| 7416   | 2000/6/7   |    | t437     | SCCmec V (5C2&5) | Blood | ND |
| 7448   | 2000/6/7   |    | t437     | SCCmec V (5C2&5) | Blood | ND |
| 7860   | 2000/6/10  |    | t437     | SCCmec V (5C2&5) | Blood | ND |
| my7965 | 2000/7/7   |    | t3485    | SCCmec V (5C2&5) | Blood | ND |
| 1199   | 2000/7/7   |    | New type | SCCmec V (5C2&5) | Blood | ND |
| c4736  | 2000/7/18  |    | t437     | SCCmec V (5C2&5) | Blood | ND |
| 2157   | 2000/10/9  | 59 | t437     | SCCmec V (5C2&5) | Blood | ND |
| 5179-1 | 2000/11/2  |    | t437     | SCCmec V (5C2&5) | Blood | ND |
| 6787-2 | 2000/11/16 |    | t437     | SCCmec V (5C2&5) | Blood | ND |
| 7179   | 2000/11/20 |    | t437     | SCCmec V (5C2&5) | Blood | ND |
| 8981   | 2000/12/5  |    | t437     | SCCmec V (5C2&5) | Blood | ND |
| 9209   | 2000/12/7  |    | t437     | SCCmec V (5C2&5) | Blood | ND |
| 104    | 2000/12/12 |    | t437     | SCCmec V (5C2&5) | Blood | ND |
| 175    | 2000/12/13 |    | t437     | SCCmec V (5C2&5) | Blood | ND |
| 355    | 2000/12/14 |    | t437     | SCCmec V (5C2&5) | Blood | ND |
| 4526   | 2005/1/27  |    | t437     | SCCmec V (5C2&5) | Blood | ND |
| 7322   | 2005/2/4   |    | t437     | SCCmec V (5C2&5) | Blood | ND |
| 6092   | 2005/2/5   |    | t437     | SCCmec V (5C2&5) | Blood | ND |
| 6534   | 2005/2/7   |    | t441     | SCCmec V (5C2&5) | Blood | ND |
| 1432   | 2005/5/3   |    | t437     | SCCmec V (5C2&5) | Blood | ND |
| 7796-2 | 2005/6/7   |    | t437     | SCCmec V (5C2&5) | Blood | ND |
| 9124   | 2005/6/14  |    | t437     | SCCmec V (5C2&5) | Blood | ND |
| 9648   | 2005/6/17  | 59 | t437     | SCCmec V (5C2&5) | Blood | ND |
| 6415   | 2005/7/24  |    | t1751    | SCCmec V (5C2&5) | Blood | ND |
| 7667   | 2005/8/1   |    | t437     | SCCmec V (5C2&5) | Blood | ND |
| 3243   | 2005/9/3   |    | t437     | SCCmec V (5C2&5) | Blood | ND |
| 6974   | 2005/9/23  |    | t437     | SCCmec V (5C2&5) | Blood | ND |
| 7180   | 2005/9/25  |    | t437     | SCCmec V (5C2&5) | Blood | ND |
| 7553   | 2005/9/27  |    | t437     | SCCmec V (5C2&5) | Blood | ND |
| 8519   | 2005/10/3  |    | t437     | SCCmec V (5C2&5) | Blood | ND |

|        |            |    |       |                  |                |     |
|--------|------------|----|-------|------------------|----------------|-----|
| 8267   | 2005/12/2  |    | t437  | SCCmec V (5C2&5) | Blood          | ND  |
| 8483   | 2005/12/4  |    | t7501 | SCCmec V (5C2&5) | Blood          | ND  |
| 8753   | 2005/12/6  | 59 | t437  | SCCmec V (5C2&5) | Blood          | ND  |
| 9039   | 2005/12/8  |    | t437  | SCCmec V (5C2&5) | Blood          | ND  |
| 1035   | 2005/12/21 |    | t437  | SCCmec V (5C2&5) | Blood          | ND  |
| 1262   | 2005/12/22 |    | t437  | SCCmec V (5C2&5) | Blood          | ND  |
| 1686   | 2005/12/25 |    | t437  | SCCmec V (5C2&5) | Blood          | ND  |
| 2803   | 2005/2/21  |    | t437  | SCCmec V (5C2&5) | eye            | Yes |
| 4010   | 2005/2/25  |    | t437  | SCCmec V (5C2&5) | external ear   | Yes |
| 5185   | 2005/3/3   |    | t437  | SCCmec V (5C2&5) | pus            | Yes |
| 5982   | 2005/3/7   | 59 | t437  | SCCmec V (5C2&5) | pus            | Yes |
| 6530   | 2005/3/8   |    | t437  | SCCmec V (5C2&5) | surgical wound | Yes |
| 2841   | 2005/5/9   | 59 | t437  | SCCmec V (5C2&5) | pus            | Yes |
| 3165   | 2005/5/10  |    | t437  | SCCmec V (5C2&5) | skin pus       | Yes |
| 3242   | 2005/5/10  |    | t437  | SCCmec V (5C2&5) | discharge      | Yes |
| 7258   | 2005/5/25  |    | t437  | SCCmec V (5C2&5) | skin pus       | Yes |
| 8917-2 | 2005/6/1   | 59 | t437  | SCCmec V (5C2&5) | sputum         | Yes |
| 2073   | 2005/6/12  |    | t437  | SCCmec V (5C2&5) | abscess        | Yes |
| 9442   | 2010/01/07 |    | t4145 | SCCmec V (5C2&5) | Blood          | ND  |
| 5312   | 2010/01/11 |    | t437  | SCCmec V (5C2&5) | Blood          | ND  |
| 2082   | 2010/01/21 | 59 | t437  | SCCmec V (5C2&5) | Blood          | ND  |
| 2910   | 2010/01/25 |    | t437  | SCCmec V (5C2&5) | Blood          | ND  |
| 4076   | 2010/02/01 | 59 |       | SCCmec V (5C2&5) | Blood          | ND  |
| 6602   | 2010/02/15 |    | t437  | SCCmec V (5C2&5) | Blood          | ND  |
| 5327   | 2010/04/02 |    | t437  | SCCmec V (5C2&5) | Blood          | ND  |
| 9572   | 2010/07/26 |    | t441  | SCCmec V (5C2&5) | Blood          | ND  |
| 2750   | 2010/08/22 |    | t437  | SCCmec V (5C2&5) | Blood          | ND  |
| 9697   | 2010/09/11 |    | t437  | SCCmec V (5C2&5) | Blood          | ND  |
| 3798   | 2010/09/30 |    | t437  | SCCmec V (5C2&5) | Blood          | ND  |
| 9464   | 2010/10/26 |    | t437  | SCCmec V (5C2&5) | Blood          | ND  |
| 1804   | 2010/12/24 |    | t437  | SCCmec V (5C2&5) | Blood          | ND  |
| 414    | 2011/02/02 | 59 | t437  | SCCmec V (5C2&5) | Blood          | ND  |
| 6395   | 2011/03/01 |    | t437  | SCCmec V (5C2&5) | Blood          | ND  |
| 9717   | 2011/05/03 |    | t437  | SCCmec V (5C2&5) | Blood          | ND  |
| 2400   | 2011/06/28 |    | t437  | SCCmec V (5C2&5) | Blood          | ND  |
| 2409   | 2011/06/28 |    | t437  | SCCmec V (5C2&5) | Blood          | ND  |
| 2615   | 2011/06/29 |    | t437  | SCCmec V (5C2&5) | Blood          | ND  |
| 4343   | 2011/08/22 |    | t437  | SCCmec V (5C2&5) | Blood          | ND  |
| 7889   | 2011/09/04 |    | t437  | SCCmec V (5C2&5) | Blood          | ND  |

<sup>a</sup> ND, not determined
