# Supplementary material for: Molecular Evolutionary Pathways toward Two Successful Community-Associated but Multidrug-Resistant ST59 Methicillin-Resistant Staphylococcus aureus Lineages in Taiwan: Dynamic Modes of Mobile Genetic Element Salvages
Source: PubMed Central journal article supplement (PMC5015870; doi:10.1371/journal.pone.0162526), 2016-09-08
Supplement: pone.0162526.s006.pdf [file pone.0162526.s006.pdf]

**S5 Table. Comparison of genetic contents of vSaβ structures in ST59 MRSA.<sup>a</sup>**

| vSaβ in strain 4578: annotation or function                    | vSaβ in strain PM1              | vSaβ in strain 187-4 |
|----------------------------------------------------------------|---------------------------------|----------------------|
| orf1                                                           | +                               | +                    |
| orf2                                                           | +                               | +                    |
| orf3                                                           | +                               | +                    |
| hypothetical protein                                           | +                               | +                    |
| putative helicase                                              | +                               | +                    |
| hyaluronate lyase precursor                                    | +                               | +                    |
| peptidase family                                               | +                               | +                    |
| truncated HsdS                                                 | +                               | +                    |
| <i>att</i> site                                                | +                               | +                    |
| staphylococcal complement inhibitor SCIN                       | +                               | -                    |
| phage lysin, N-acetylmuramoyl-L-alanine amidase, truncated     | +                               | -                    |
| staphylokinase SAK                                             | -                               | -                    |
| autolysin                                                      | -                               | -                    |
| holin                                                          | -                               | -                    |
| hypothetical protein                                           | -                               | -                    |
| staphylococcal enterotoxin P, SEP                              | -                               | -                    |
| hypothetical protein                                           | -                               | -                    |
| hypothetical protein                                           | -                               | -                    |
| phi77 ORF044-like protein                                      | -                               | -                    |
| phi77 ORF109-like protein                                      | -                               | -                    |
| phi77 ORF002-like protein, phage minor structural protein      | -                               | -                    |
| phi77 ORF004-like protein, putative phage tail component       | -                               | -                    |
| phi77 ORF001-like protein, phage tail tape measure protein     | -                               | -                    |
| phi77 ORF100-like protein                                      | -                               | -                    |
| conserved hypothetical phage protein                           | -                               | -                    |
| hypothetical phage protein                                     | -                               | -                    |
| phi77 ORF020-like protein, phage major tail protein            | -                               | -                    |
| conserved hypothetical phage protein                           | -                               | -                    |
| conserved hypothetical phage protein                           | -                               | -                    |
| hypothetical protein                                           | -                               | -                    |
| phi77 ORF006-like protein, putative capsid protein             | -                               | -                    |
| phi77 ORF015-like protein, putative protease                   | -                               | -                    |
| phage portal protein                                           | -                               | -                    |
| phi77 ORF003-like protein, phage terminase, large subunit      | -                               | -                    |
| conserved hypothetical phage protein                           | -                               | -                    |
| phi77 ORF040-like protein                                      | -                               | -                    |
| phi77 ORF026-like protein, putative phage transcriptional acti | -                               | -                    |
| phi77 ORF071-like protein                                      | -                               | -                    |
| phiPVL ORF057-like protein, transcriptional activator RinB     | -                               | -                    |
| phi77 ORF031-like protein                                      | -                               | -                    |
| phi77 ORF069-like protein                                      | -                               | -                    |
| hypothetical protein                                           | -                               | -                    |
| putative dUTPase                                               | -                               | -                    |
| hypothetical protein                                           | -                               | -                    |
| phage protein                                                  | -                               | -                    |
| phiPVL ORF051-like protein                                     | -                               | -                    |
| phiPVL ORF050-like protein                                     | -                               | -                    |
| putative endodeoxyribonuclease                                 | -                               | -                    |
| conserved hypothetical phage protein                           | -                               | -                    |
| phiPVL ORF046-like protein                                     | -                               | -                    |
| single-strand binding protein                                  | -                               | -                    |
| phiPVL ORF044-like protein                                     | -                               | -                    |
| putative phage-related DNA recombination protein               | -                               | -                    |
| phiPVL ORF41-like protein                                      | -                               | -                    |
| phiPVL ORF39-like protein                                      | -                               | -                    |
| conserved hypothetical phage protein                           | -                               | -                    |
| conserved hypothetical phage protein                           | -                               | -                    |
| hypothetical protein                                           | -                               | -                    |
| hypothetical protein                                           | -                               | -                    |
| phi77 ORF014-like protein, phage anti-repressor protein        | -                               | -                    |
| conserved hypothetical phage protein                           | -                               | -                    |
| DNA-binding protein                                            | -                               | -                    |
| phi77 ORF011-like protein, phage transcriptional repressor     | -                               | -                    |
| putative exonuclease                                           | -                               | -                    |
| hypothetical protein                                           | -                               | -                    |
| hypothetical protein                                           | -                               | -                    |
| integrase                                                      | -                               | -                    |
| <i>att</i> site                                                | -                               | -                    |
| truncated chemotaxis inhibitory protein CHIPS, lack 5'-end     | +/- (full length of CHIPS gene) | +                    |
| Phage lysin, N-acetylmuramoyl-L-alanine amidase, truncated     | +                               | +                    |
| IstB helper protein                                            | +                               | +                    |
| trasposase of IS232                                            | +                               | +                    |
| Hypothetical protein                                           | +                               | +                    |

<sup>a</sup> +: presence; -: absence; +/-: divergency
